# Supplementary material for: Enhanced Micro-Channeling System via Dissolving Microneedle to Improve Transdermal Serum Delivery for Various Clinical Skincare Treatments
Source: Pharmaceutics. 2022 Dec 14;14(12):2804. doi: 10.3390/pharmaceutics14122804 (PMC9781352; doi:10.3390/pharmaceutics14122804)
Supplement: Supplementary file 1 [file pharmaceutics-14-02804-s001.zip › pharmaceutics-1981707-supplementary.pdf]

# Enhanced micro-channeling system via dissolving microneedle to improve transdermal serum delivery for various clinical skincare treatments

Jeeho Sim<sup>1</sup>, SeongDae Gong<sup>1,2</sup>, Geonwoo Kang<sup>1,2</sup>, Mingyu Jang<sup>2</sup>, Huisuk Yang<sup>2</sup>, Jaesung Park<sup>3</sup>, Youngchan Kim<sup>3</sup>, Hyunkyu Lee<sup>1,2</sup>, Hyunji Jung<sup>1,2</sup>, Youseong Kim<sup>1</sup>, Chansol Jeon<sup>1,2</sup>, Hyeri Ahn<sup>1</sup>, Minkyung Kim<sup>1</sup>, Jaibyoung Choi<sup>1</sup>, Ho Lee<sup>4,5,6</sup> and Hyungil Jung<sup>1,2,\*</sup>

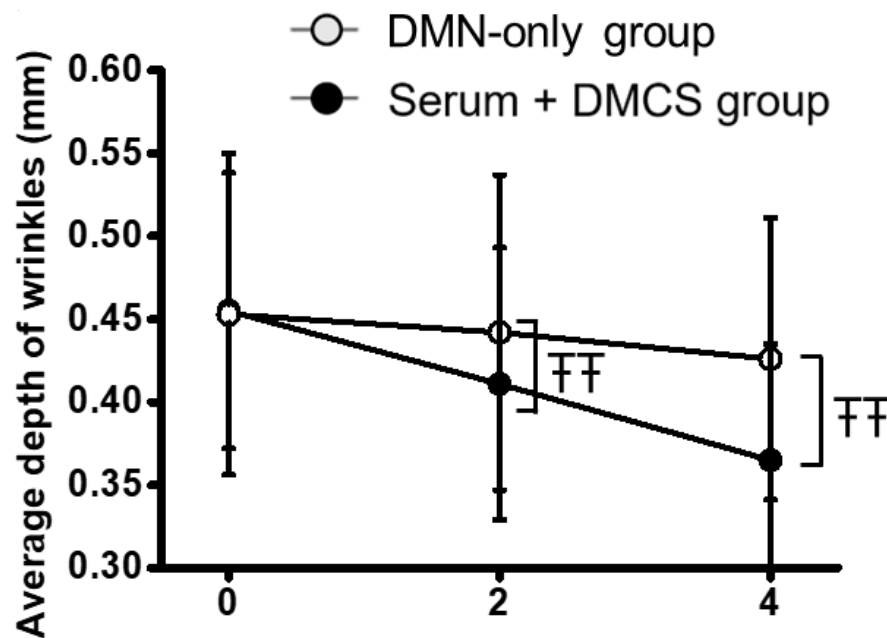

**Figure S1.** Decrease in the average wrinkle depths of DMN-only application group and combinatorial application group before use, 2-, and 4-week use. FF:  $p < 0.05$  by repeated ANOVA.

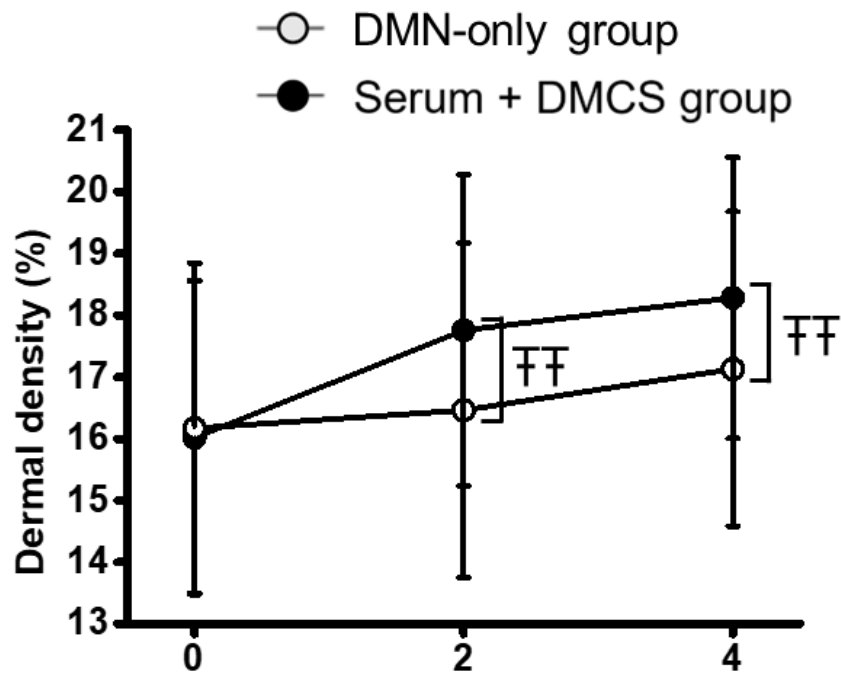

**Figure S2.** Improvement in the dermal density of DMN-only application group and combinatorial application group before use, 2-, and 4-week use. FF:  $p < 0.05$  by repeated ANOVA

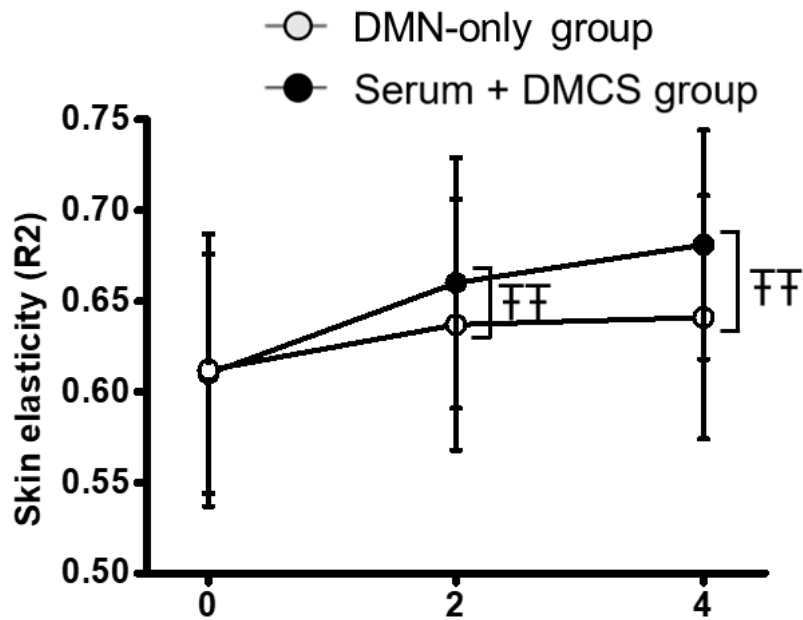

**Figure S3.** Improvement in the skin elasticity of DMN-only application group and combinatorial application group before use, 2-, and 4-week use. FF:  $p < 0.05$  by repeated ANOVA.
